# Supplementary material for: Spectroscopic characterization of C-4 substituted 3,5-dichloro-4H-1,2,6-thiadiazines
Source: Royal Society of Chemistry journal article supplement (doi:10.1039/c4ra16144k), 2015-01-01
Supplement: c4ra16144k1.pdf [file c4ra16144k1.pdf]

## Electronic Supplementary Information

### Spectroscopic characterization of C-4 substituted 3,5-dichloro-4*H*-1,2,6-thiadiazines

Eleni Theodorou, Heraklidia A. Ioannidou, Theodosia A. Ioannou, Andreas S. Kalogirou, Christos P. Constantinides, Maria Manoli, Panayiotis A. Koutentis,\* and Sophia C. Hayes\*

Department of Chemistry, University of Cyprus, P.O. Box 20537, 1678, Nicosia, Cyprus

| Contents                                                                                                                                               | Page |
|--------------------------------------------------------------------------------------------------------------------------------------------------------|------|
| 1. Comparison of IR and resonance Raman spectra of thiadiazines <b>5a</b> , <b>5b</b> and <b>5c</b>                                                    | 2    |
| 2. Atomic coordinates of the geometry optimized structures of thiadiazines <b>5a</b> , <b>5b</b> and <b>5c</b> and their H-analogs using MP2/6-311G(d) | 3    |
| 3. Comparison of bond lengths and angles of thiadiazines <b>5a</b> , <b>5b</b> and <b>5c</b> from X-ray crystal structures and geometry optimizations. | 9    |

1. Comparison of IR and resonance Raman spectra of thiadiazines **5a**, **5b** and **5c**

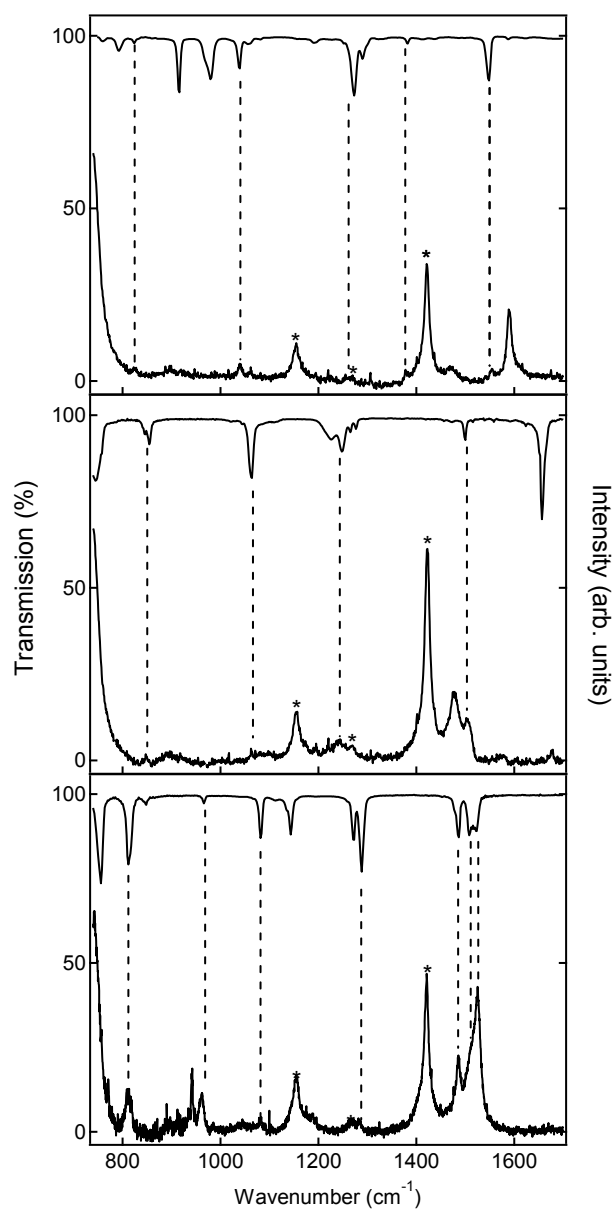

**Figure S1.** Comparison of IR and Raman spectra of thiadiazine **5a** (top), **5b** (middle) and **5c** (bottom). The IR spectra are shown in transmission (top of each panel). In the case of thiadiazine **5b**, the IR spectrum was multiplied by two for clarity.

## 2. Atomic coordinates of the geometry optimized structures of thiadiazines 5a, 5b and 5c and their H-analogues using MP2/6-311G(d)

### 2.1 3,5-Dichloro-4-methylene-4H-1,2,6-thiadiazine (5a)

Figure S1 Optimised geometry using MP2/6-311G(d) showing atom labels

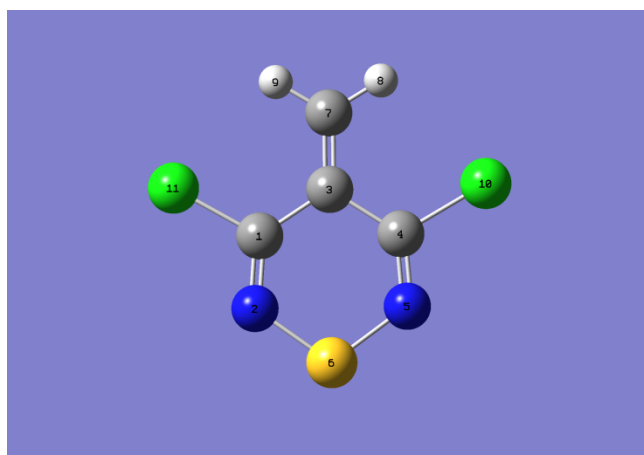

#### Atomic coordinates

|      |          |          |          |
|------|----------|----------|----------|
| C1   | -0.00002 | -0.01575 | 1.241068 |
| N2   | -0.00002 | 1.266697 | 1.340458 |
| C3   | 0.000022 | -0.81886 | 0        |
| C4   | -0.00002 | -0.01575 | -1.24107 |
| N5   | -0.00002 | 1.266697 | -1.34046 |
| S6   | -1E-06   | 2.243887 | 0        |
| C7   | 0.00011  | -2.17292 | 0        |
| H8   | 0.000148 | -2.73159 | -0.92553 |
| H9   | 0.000148 | -2.73159 | 0.925532 |
| Cl10 | -1.6E-05 | -0.88333 | -2.74823 |
| Cl11 | -1.6E-05 | -0.88333 | 2.748228 |

2.2 4-Methylene-4H-1,2,6-thiadiazine (**5a** with Cl substituted with H)

**Figure S2** Optimised geometry using MP2/6-311G(d) showing atom labels

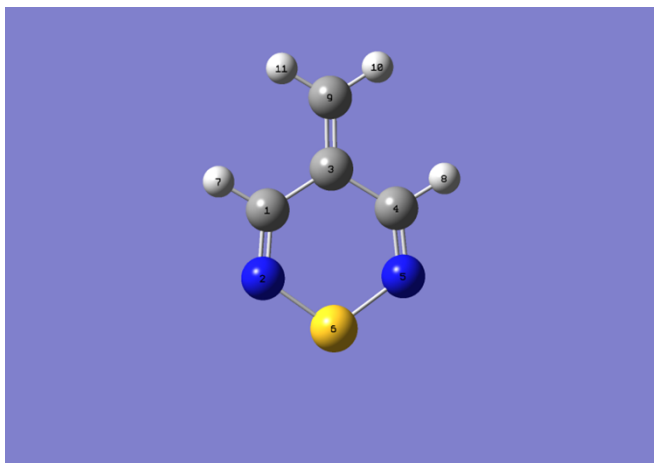

Atomic coordinates

|     |          |          |          |
|-----|----------|----------|----------|
| C1  | -0.52692 | -1.24891 | 0.000042 |
| N2  | 0.766276 | -1.36086 | 0.000019 |
| C3  | -1.29261 | 0        | 0.000004 |
| C4  | -0.52692 | 1.248911 | 0.000042 |
| N5  | 0.766276 | 1.360854 | 0.000019 |
| S6  | 1.738807 | 0        | -3.3E-05 |
| H7  | -1.07991 | -2.19091 | 0.000079 |
| H8  | -1.07991 | 2.190905 | 0.000079 |
| C9  | -2.64792 | 0.000001 | -4.7E-05 |
| H10 | -3.21136 | 0.928108 | -6.9E-05 |
| H11 | -3.21136 | -0.92811 | -6.9E-05 |

2.3 3,5-Dichloro-4H-1,2,6-thiadiazin-4-one (**5b**)

**Figure S3** Optimised geometry using MP2/6-311G(d) showing atom labels

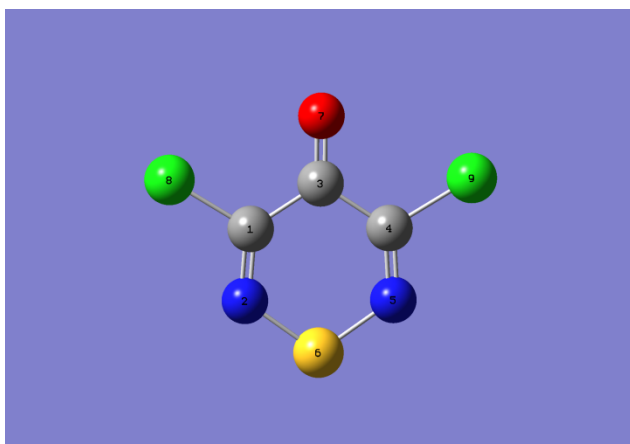

Atomic coordinates

|   |          |          |          |
|---|----------|----------|----------|
| 1 | -5E-06   | -0.02818 | 1.244174 |
| 2 | -2.4E-05 | 1.272124 | 1.3307   |
| 3 | 0.000057 | -0.84314 | 0        |
| 4 | -5E-06   | -0.02818 | -1.24417 |
| 5 | -2.4E-05 | 1.272124 | -1.3307  |
| 6 | -1.7E-05 | 2.217415 | 0        |
| 7 | 0.000064 | -2.06469 | 0        |
| 8 | -5E-06   | -0.92276 | 2.710934 |
| 9 | -5E-06   | -0.92276 | -2.71093 |

2.4 4H-1,2,6-Thiadiazin-4-one (**5b** with Cl substituted with H)

**Figure S4** Optimised geometry using MP2/6-311G(d) showing atom labels

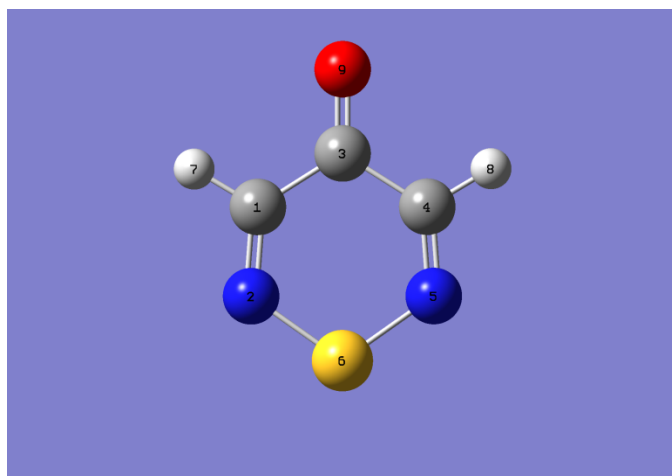

Atomic coordinates

|   |          |          |          |
|---|----------|----------|----------|
| 1 | -7.7E-05 | -0.55866 | 1.245979 |
| 2 | -7.7E-05 | 0.748805 | 1.343998 |
| 3 | 0.000132 | -1.34277 | 0        |
| 4 | -7.7E-05 | -0.55866 | -1.24598 |
| 5 | -7.7E-05 | 0.748805 | -1.344   |
| 6 | 0.000035 | 1.694294 | 0        |
| 7 | -0.00017 | -1.11525 | 2.183778 |
| 8 | -0.00017 | -1.11525 | -2.18378 |
| 9 | 0.000124 | -2.57511 | 0        |

2.5 2-(3,5-Dichloro-4H-1,2,6-thiadiazin-4-ylidene)malononitrile (**5c**)

**Figure S5** Optimised geometry using MP2/6-311G(d) showing atom labels

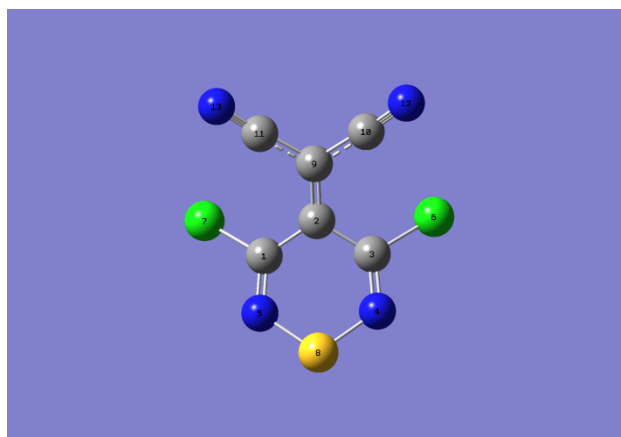

Atomic coordinates

|    |          |          |          |
|----|----------|----------|----------|
| 1  | 0.665807 | 1.214645 | 0.146719 |
| 2  | -0.14228 | -0.00033 | 0.022368 |
| 3  | 0.66954  | -1.21283 | 0.146726 |
| 4  | 1.885151 | -1.3181  | -0.30634 |
| 5  | 1.881061 | 1.323695 | -0.30642 |
| 6  | 0.01124  | -2.58089 | 0.954535 |
| 7  | 0.002978 | 2.580878 | 0.953923 |
| 8  | 2.699092 | 0.004051 | -0.83801 |
| 9  | -1.4957  | -0.0023  | -0.24594 |
| 10 | -2.24703 | -1.19949 | -0.45983 |
| 11 | -2.25038 | 1.192822 | -0.4596  |
| 12 | -2.92494 | -2.13762 | -0.6895  |
| 13 | -2.93083 | 2.129198 | -0.68893 |

2.6 2-(4H-1,2,6-Thiadiazin-4-ylidene)malononitrile (**5c** with Cl substituted with H)

**Figure S7** Optimised geometry using MP2/6-311G(d) showing atom labels

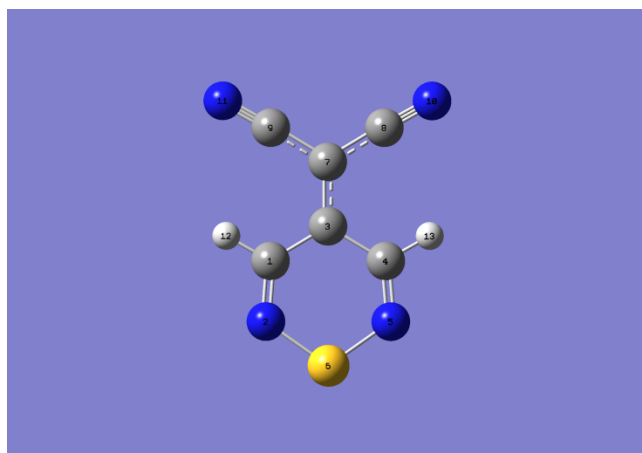

Atomic coordinates

|    |          |          |          |
|----|----------|----------|----------|
| 1  | 0.000283 | -0.56937 | 1.239975 |
| 2  | 0.000092 | -1.87703 | 1.342897 |
| 3  | 0.000054 | 0.178313 | 0        |
| 4  | 0.000283 | -0.56937 | -1.23998 |
| 5  | 0.000092 | -1.87703 | -1.3429  |
| 6  | -0.00023 | -2.82781 | 0        |
| 7  | -4.1E-05 | 1.565865 | 0        |
| 8  | -9.9E-05 | 2.302998 | -1.22105 |
| 9  | -9.9E-05 | 2.302998 | 1.22105  |
| 10 | -6.9E-05 | 2.879637 | -2.25033 |
| 11 | -6.9E-05 | 2.879637 | 2.250325 |
| 12 | 0.000509 | -0.03012 | 2.18773  |
| 13 | 0.000509 | -0.03012 | -2.18773 |



### 3. Comparison of bond lengths and angles of thiadiazines 5a, 5b and 5c from X-ray crystal structures and geometry optimizations

#### 3.1 3,5-Dichloro-4-methylene-4H-1,2,6-thiadiazine (5a)

**Table S1.** Experimental and computational bond lengths for 3,5-dichloro-4-methylene-4H-1,2,6-thiadiazine (5a)

| Atom1 <sup>a</sup> | Atom2 <sup>a</sup> | X-ray length (Å) | MP2/6-311G(d) (Å) |
|--------------------|--------------------|------------------|-------------------|
| C1                 | N2                 | 1.273(4)         | 1.286             |
| C1                 | C3                 | 1.473(5)         | 1.478             |
| C1                 | Cl11               | 1.743(4)         | 1.739             |
| N2                 | S6                 | 1.657(3)         | 1.659             |
| C3                 | C4                 | 1.470(5)         | 1.478             |
| C3                 | C7                 | 1.341(5)         | 1.354             |
| C4                 | N5                 | 1.266(5)         | 1.286             |
| C4                 | Cl10               | 1.745(4)         | 1.739             |
| N5                 | S6                 | 1.661(3)         | 1.659             |
| C7                 | H8                 | 0.930(4)         | 1.081             |
| C7                 | H9                 | 0.930(4)         | 1.081             |

<sup>a</sup> Atom labels as in Figure S1.

**Table S2** Experimental and computational bond angles for 3,5-dichloro-4-methylene-4H-1,2,6-thiadiazine (5a)

| Atom1 <sup>a</sup> | Atom2 <sup>a</sup> | Atom3 <sup>a</sup> | X-ray angle (°) | MP2/6-311G(d) (°) |
|--------------------|--------------------|--------------------|-----------------|-------------------|
| N2                 | C1                 | C3                 | 128.1(3)        | 127.3             |
| N2                 | C1                 | Cl11               | 114.8(3)        | 115.5             |
| C3                 | C1                 | Cl11               | 117.1(3)        | 117.2             |
| C1                 | N2                 | S6                 | 121.4(3)        | 121.7             |
| C1                 | C3                 | C4                 | 113.2(3)        | 114.2             |
| C1                 | C3                 | C7                 | 122.8(3)        | 122.9             |
| C4                 | C3                 | C7                 | 124.0(3)        | 122.9             |
| C3                 | C4                 | N5                 | 128.5(4)        | 127.3             |
| C3                 | C4                 | Cl10               | 116.4(3)        | 117.2             |
| N5                 | C4                 | Cl10               | 115.1(3)        | 115.5             |
| C4                 | N5                 | S6                 | 121.3(3)        | 121.7             |
| N2                 | S6                 | N5                 | 107.4(2)        | 107.8             |
| C3                 | C7                 | H8                 | 120.1(4)        | 121.1             |
| C3                 | C7                 | H9                 | 120.0(4)        | 121.1             |
| H8                 | C7                 | H9                 | 120.0(4)        | 117.8             |

<sup>a</sup> Atom labels as in Figure S1.

3.2 3,5-Dichloro-4H-1,2,6-thiadiazin-4-one (**5b**)

**Table S3** Experimental and computational bond lengths for 3,5-dichloro-4H-1,2,6-thiadiazin-4-one (**5b**)

| Atom1 <sup>a</sup> | Atom2 <sup>a</sup> | X-ray length (Å) <sup>b</sup> | MP2/6-311G(d) (Å) |
|--------------------|--------------------|-------------------------------|-------------------|
| C1                 | N2                 | 1.272                         | 1.303             |
| C1                 | C3                 | 1.474                         | 1.487             |
| C1                 | C18                | 1.720                         | 1.718             |
| N2                 | S6                 | 1.618                         | 1.632             |
| C3                 | C4                 | 1.477                         | 1.487             |
| C3                 | O7                 | 1.209                         | 1.222             |
| C4                 | N5                 | 1.276                         | 1.303             |
| C4                 | C19                | 1.720                         | 1.718             |
| N5                 | S6                 | 1.615                         | 1.632             |

<sup>a</sup> Atom labels as in Figure S3. <sup>b</sup> Bond length error limits not known.

**Table S4** Experimental and computational bond angles for 3,5-dichloro-4H-1,2,6-thiadiazin-4-one (**5b**)

| Atom1 <sup>a</sup> | Atom2 <sup>a</sup> | Atom3 <sup>a</sup> | X-ray angle (°) <sup>b</sup> | MP2/6-311G(d) (°) |
|--------------------|--------------------|--------------------|------------------------------|-------------------|
| N2                 | C1                 | C3                 | 127.4                        | 127.0             |
| N2                 | C1                 | C18                | 117.4                        | 117.6             |
| C3                 | C1                 | C18                | 115.3                        | 115.4             |
| C1                 | N2                 | S6                 | 121.8                        | 121.6             |
| C1                 | C3                 | C4                 | 113.0                        | 113.5             |
| C1                 | C3                 | O7                 | 123.5                        | 123.2             |
| C4                 | C3                 | O7                 | 123.6                        | 123.2             |
| C3                 | C4                 | N5                 | 127.3                        | 127.0             |
| C3                 | C4                 | C19                | 114.9                        | 115.4             |
| N5                 | C4                 | C19                | 117.8                        | 117.6             |
| C4                 | N5                 | S6                 | 121.7                        | 121.6             |
| N2                 | S6                 | N5                 | 108.8                        | 109.2             |

<sup>a</sup> Atom labels as in Figure S3. <sup>b</sup> Bond angle error limits not known.

3.3 2-(3,5-Dichloro-4H-1,2,6-thiadiazin-4-ylidene)malononitrile (**5c**)

**Table S5** Experimental and computational bond lengths for 2-(3,5-dichloro-4H-1,2,6-thiadiazin-4-ylidene)malononitrile (**5c**)

| Atom1 <sup>a</sup> | Atom2 <sup>a</sup> | X-ray length (Å) <sup>b</sup> |          |          |          | MP2/6-311G(d) (Å) |
|--------------------|--------------------|-------------------------------|----------|----------|----------|-------------------|
|                    |                    | A                             | B        | C        | D        |                   |
| C1                 | C2                 | 1.47(1)                       | 1.44(1)  | 1.47(1)  | 1.447(9) | 1.465             |
| C1                 | N5                 | 1.28(1)                       | 1.25(1)  | 1.27(1)  | 1.27(1)  | 1.302             |
| C1                 | Cl7                | 1.722(7)                      | 1.719(7) | 1.733(7) | 1.722(9) | 1.720             |
| C2                 | C3                 | 1.468(9)                      | 1.457(9) | 1.433(9) | 1.46(1)  | 1.465             |
| C2                 | C9                 | 1.36(1)                       | 1.39(1)  | 1.36(1)  | 1.35(1)  | 1.380             |
| C3                 | N4                 | 1.27(1)                       | 1.27(1)  | 1.28(1)  | 1.28(1)  | 1.302             |
| C3                 | Cl6                | 1.703(8)                      | 1.719(8) | 1.711(9) | 1.711(7) | 1.720             |
| N4                 | S8                 | 1.612(7)                      | 1.618(7) | 1.620(8) | 1.618(7) | 1.641             |
| N5                 | S8                 | 1.599(7)                      | 1.625(7) | 1.597(7) | 1.633(8) | 1.641             |
| C9                 | C10                | 1.46(1)                       | 1.42(1)  | 1.433(9) | 1.422(9) | 1.430             |
| C9                 | C11                | 1.43(1)                       | 1.42(1)  | 1.45(1)  | 1.45(1)  | 1.430             |
| C10                | N12                | 1.11(1)                       | 1.14(1)  | 1.14(1)  | 1.131(9) | 1.180             |
| C11                | N13                | 1.14(1)                       | 1.14(1)  | 1.125(9) | 1.16(1)  | 1.180             |

<sup>a</sup> Atom labels as in Figure S5. <sup>b</sup> Four independent molecules (**A-D**) per unit cell.

**Table S6** Experimental and computational bond angles for 2-(3,5-dichloro-4H-1,2,6-thiadiazin-4-ylidene)malononitrile (**5c**)

| Atom1 <sup>a</sup> | Atom2 <sup>a</sup> | Atom3 <sup>a</sup> | X-ray angle (°) <sup>b</sup> |          |          |          | MP2/6-311G(d) (°) |
|--------------------|--------------------|--------------------|------------------------------|----------|----------|----------|-------------------|
|                    |                    |                    | A                            | B        | C        | D        |                   |
| C2                 | C1                 | N5                 | 126.8(7)                     | 125.3(7) | 126.5(7) | 127.6(7) | 123.7             |
| C2                 | C1                 | Cl7                | 117.3(5)                     | 118.7(5) | 118.8(5) | 119.0(5) | 119.1             |
| N5                 | C1                 | Cl7                | 115.5(6)                     | 115.8(6) | 114.5(6) | 113.4(6) | 117.2             |
| C1                 | C2                 | C3                 | 112.1(6)                     | 112.8(6) | 112.1(6) | 111.4(6) | 112.0             |
| C1                 | C2                 | C9                 | 123.7(7)                     | 123.4(6) | 123.1(6) | 124.9(6) | 124.0             |
| C3                 | C2                 | C9                 | 124.1(6)                     | 123.8(6) | 124.8(6) | 123.7(6) | 124.0             |
| C2                 | C3                 | N4                 | 124.7(7)                     | 125.4(7) | 126.2(7) | 126.3(7) | 123.7             |
| C2                 | C3                 | Cl6                | 119.1(5)                     | 118.7(5) | 119.3(5) | 119.0(6) | 119.1             |
| N4                 | C3                 | Cl6                | 116.3(6)                     | 115.8(6) | 114.4(6) | 114.6(6) | 117.2             |
| C3                 | N4                 | S8                 | 123.7(6)                     | 121.9(6) | 122.3(6) | 121.9(6) | 120.7             |
| C1                 | N5                 | S8                 | 121.8(6)                     | 123.0(6) | 122.3(6) | 120.6(6) | 120.7             |
| N4                 | S8                 | N5                 | 107.0(4)                     | 106.3(4) | 107.0(4) | 107.1(4) | 107.2             |
| C2                 | C9                 | C10                | 125.3(7)                     | 126.3(7) | 125.0(6) | 125.2(7) | 123.1             |
| C2                 | C9                 | C11                | 124.0(7)                     | 124.9(7) | 125.3(6) | 125.0(7) | 123.1             |
| C10                | C9                 | C11                | 110.6(7)                     | 108.6(6) | 109.5(6) | 109.5(7) | 113.6             |
| C9                 | C11                | N13                | 172(1)                       | 173.8(8) | 172.3(8) | 172(1)   | 175.6             |
| C9                 | C10                | N12                | 170.2(9)                     | 172.7(8) | 170.4(8) | 170.5(8) | 175.6             |

<sup>a</sup> Atom labels as in Figure S5. <sup>b</sup> Four independent molecules (**A-D**) per unit cell.
